# Supplementary material for: Molecular and Functional Characterization of Three General Odorant-Binding Protein 2 Genes in Cydia pomonella (Lepidoptera: Tortricidae)
Source: MDPI journal article supplement (doi:10.3390/ijms25031746), 2024-02-01
Supplement: s1 [file s1]

Table S1 Key amino acid sites of CpomGOBP2a and CpomGOBP2b with their ligands

| Receptors  | Ligands                                                         | CAS ID     | CID     | Key amino acid sites<br>(The location number are referred to CpomGOBP2a)              |
|------------|-----------------------------------------------------------------|------------|---------|---------------------------------------------------------------------------------------|
| CpomGOBP2a | butyl octanoate                                                 | 589-75-3   | 11517   | 27V, 28T, 31F, 52F, 55F, 56W, 71I, 80L, 92M, 95Y, 109M, 113I, 130V, 133V, 134A, 137F  |
| CpomGOBP2a | ethyl (2 <i>E</i> ,4 <i>Z</i> )-deca-2,4-dienoate (pear easter) | 3025-30-7  | 5281162 | 24M, 27V, 31F, 52F, 55F, 56W, 71I, 80L, 92M, 95Y, 109M, 113I, 130V, 133V, 134A, 137F  |
| CpomGOBP2a | codlemone                                                       | 33956-49-9 | 1787910 | 28T, 52F, 55F, 56W, 71I, 81L, 85A, 86R, 87M, 113I, 117E, 129R, 130V, 133V, 134A, 137F |
| CpomGOBP2a | geranylacetone                                                  | 3796-70-1  | 1549778 | 24M, 27V, 28T, 31F, 52F, 55F, 56W, 71I, 75S, 80L, 92M, 95Y, 109M, 113I, 134A, 137F    |
| CpomGOBP2b | ethyl (2 <i>E</i> ,4 <i>Z</i> )-deca-2,4-dienoate (pear easter) | 3025-30-7  | 5281162 | 33M, 36V, 37N, 40Y, 61W, 65W, 80I, 84S, 89L, 90L, 96M, 101M, 104Y, 122F, 143M, 146F   |

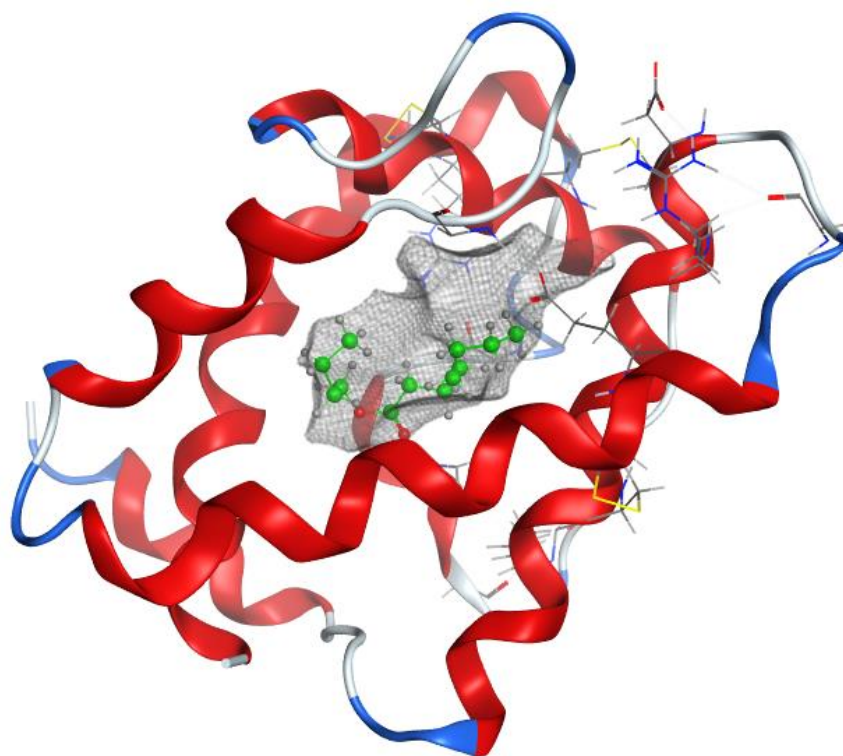

Figure S1 3D demonstration of the CpomGOBP2a binding to its butyl octanoate ligand

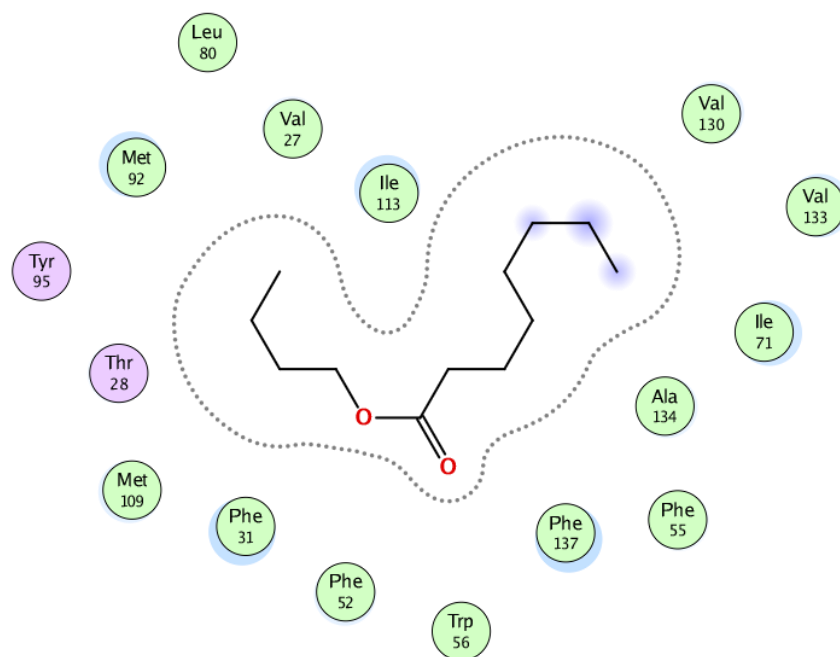

Figure S2 Key interactions at the active sites between the CpomGOBP2a and butyl octanoate

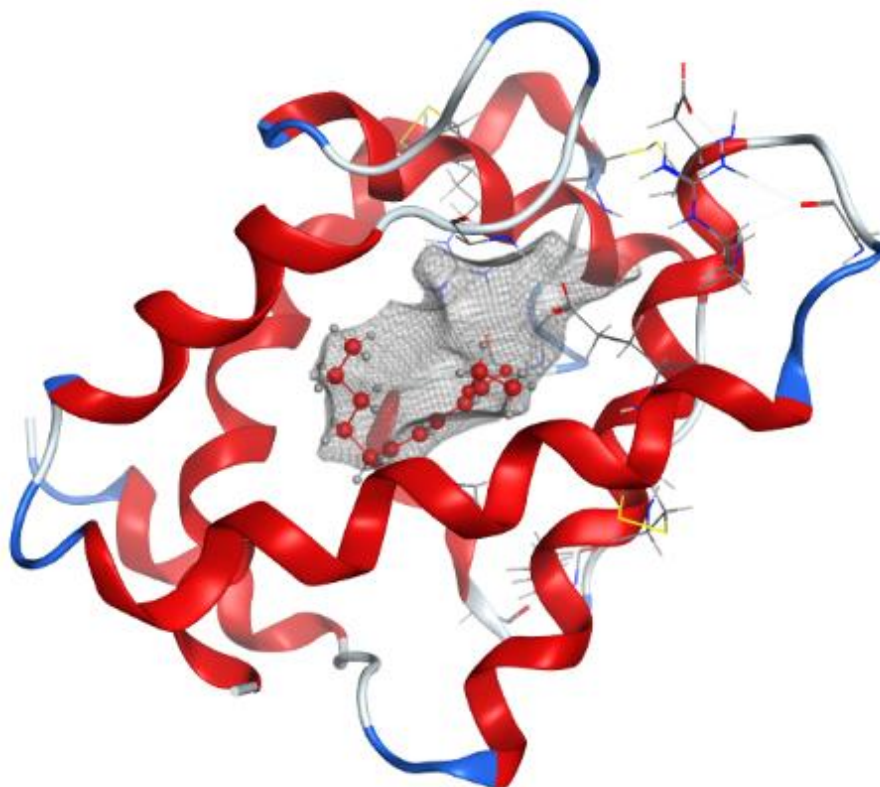

Figure S3 3D demonstration of the CpomGOBP2a binding to its ethyl (2*E*,4*Z*)-deca-2,4-dienoate (pear easter) ligand

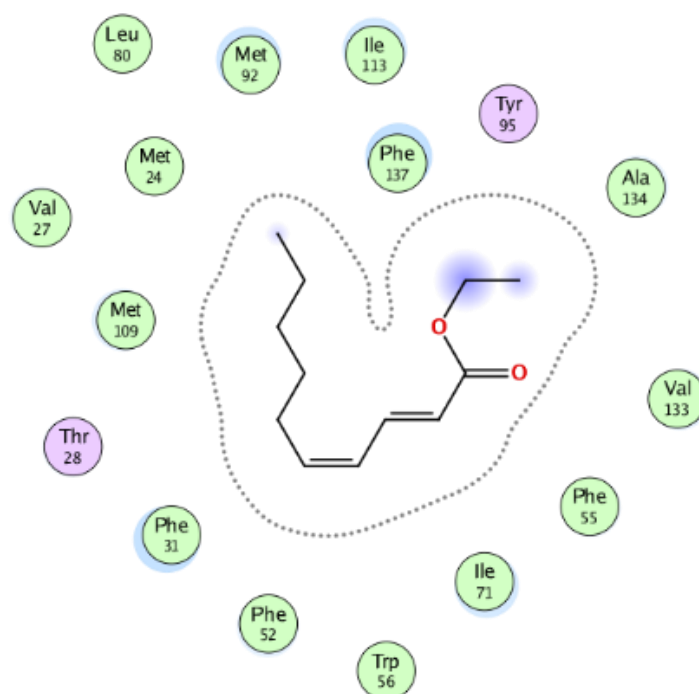

Figure S4 Key interactions at the active sites between the CpomGOBP2a and ethyl (2*E*,4*Z*)-deca-2,4-dienoate (pear easter)

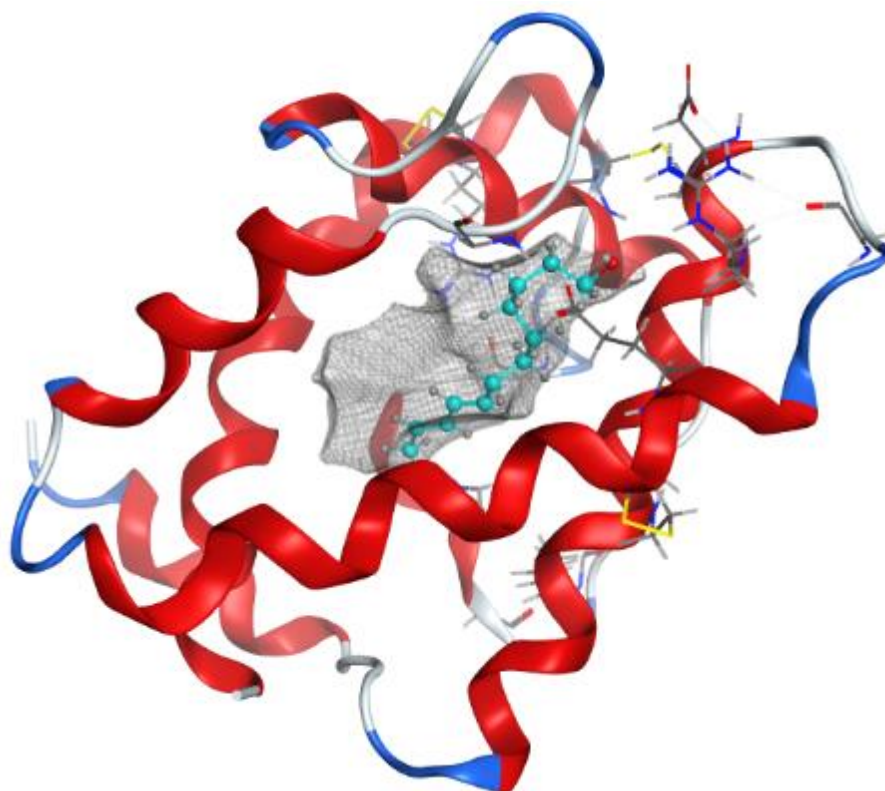

Figure S5 3D demonstration of the CpomGOBP2a binding to its codlemone ligand

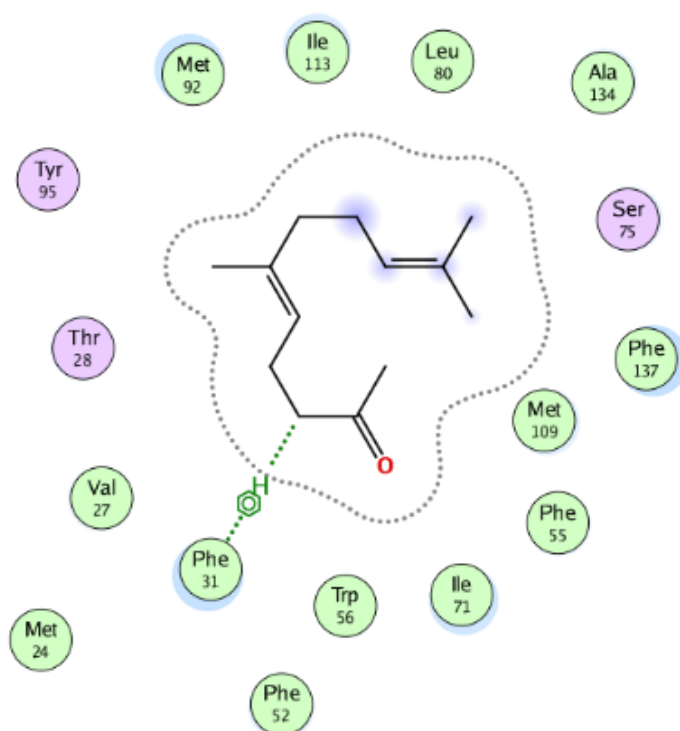

Figure S6 Key interactions at the active sites between the CpomGOBP2a and codlemone

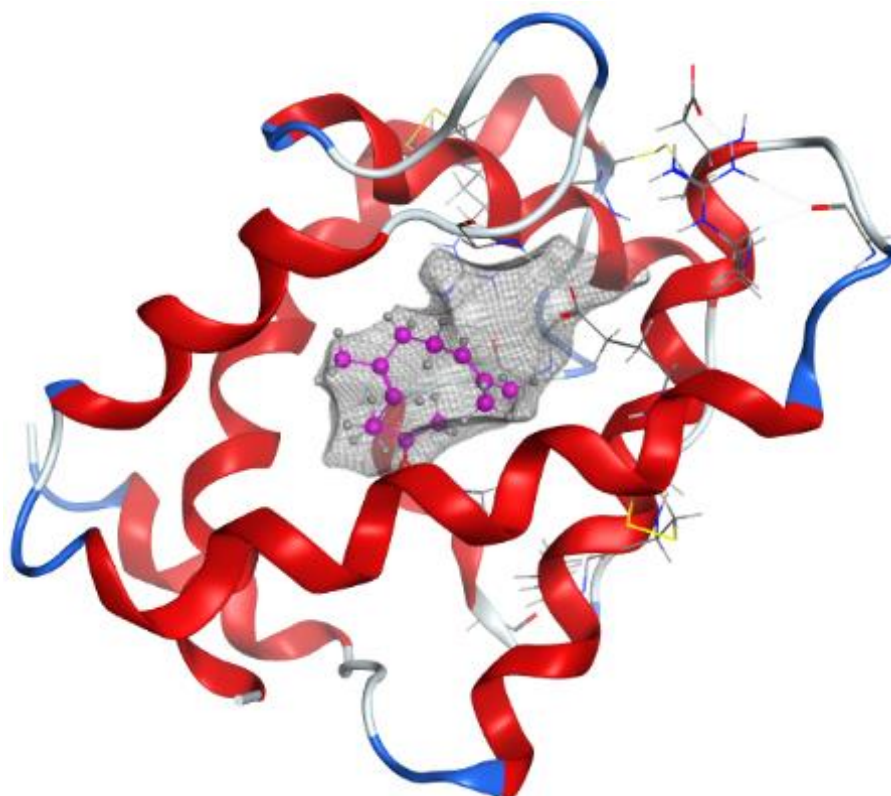

Figure S7 3D demonstration of the CpomGOBP2a binding to its geranylacetone ligand

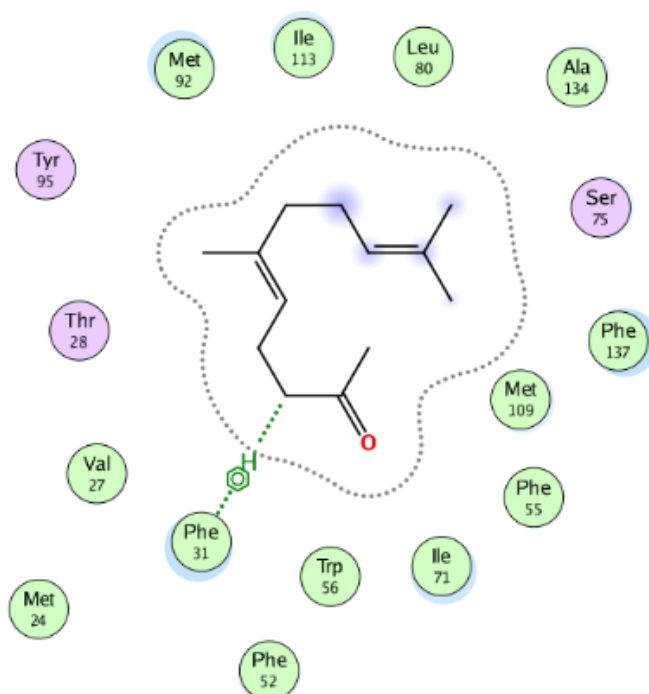

Figure S8 Key interactions at the active sites between the CpomGOBP2a and geranylacetone

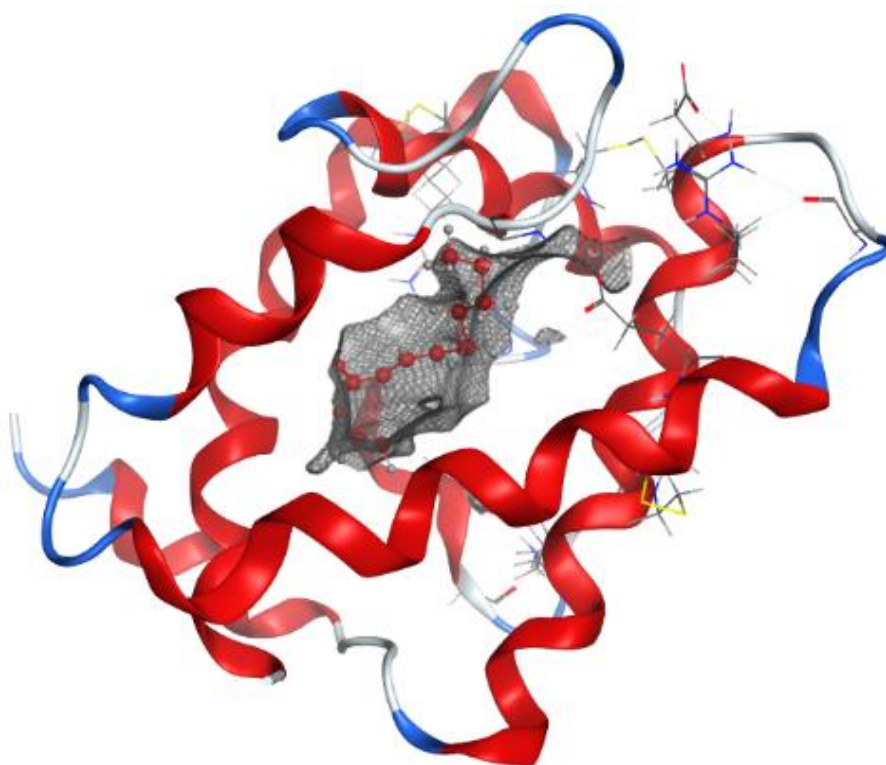

Figure S9 3D demonstration of the CpomGOBP2b binding to its ethyl (2*E*,4*Z*)-deca-2,4-dienoate (pear ester) ligand

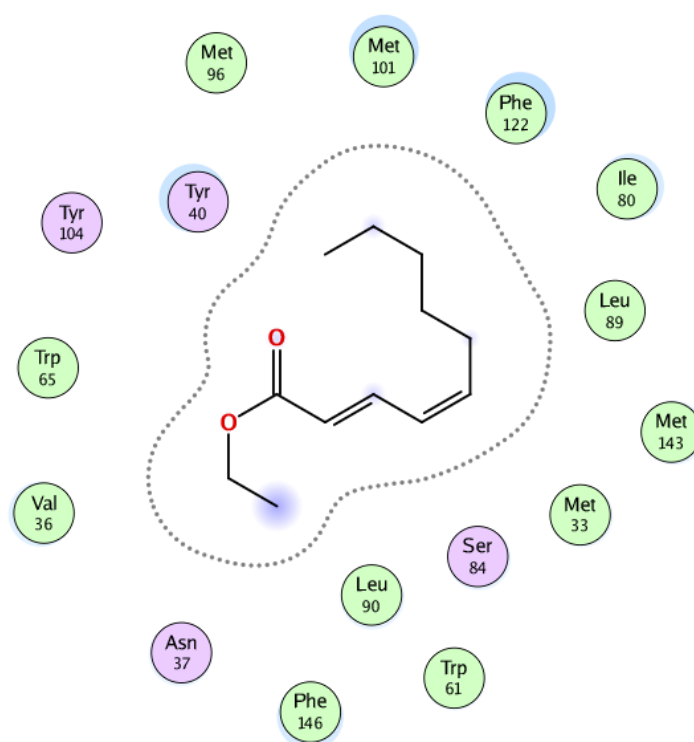

Figure S10 Key interactions at the active sites between the CpomGOBP2b and ethyl (2*E*,4*Z*)-deca-2,4-dienoate (pear ester)
